# Supplementary material for: Prestoring lithium in a 3D carbon fiber cloth coated with MOF-derived MnO for composite lithium anodes with high areal capacity and current density
Source: Royal Society of Chemistry journal article supplement (doi:10.1039/d3ce01005h), 2024-01-01
Supplement: d3ce01005h1.pdf [file d3ce01005h1.pdf]

## Supporting Information

### **Prestoring lithium into MOF-derived MnO coated 3D carbon fiber cloth for composite lithium anode with high areal capacity and current density**

Ye Liu <sup>a</sup>, Xingtong Guo <sup>a</sup>, Yanyan Zhou <sup>a</sup>, Mengting Wang <sup>a</sup>, Cheng Sun <sup>a</sup>,

Shoudong Xu <sup>b</sup>, Xiangyun Qiu <sup>c</sup>, Qing Huang <sup>d</sup>, Tao Wei <sup>a,\*</sup>

<sup>a</sup> *School of Energy and Power, Jiangsu University of Science and Technology,  
Zhenjiang 212003, China*

<sup>b</sup> *College of Chemical Engineering and Technology, Taiyuan University of  
Technology, 030024, Taiyuan, Shanxi Province, China.*

<sup>c</sup> *Power & Energy Storage System Research Center, College of Mechanical and  
Electrical Engineering, Qingdao University, Qingdao, 266071, China.*

<sup>d</sup> *College of Materials Science and Engineering, Nanjing Forestry University,  
Nanjing, 210037, China.*

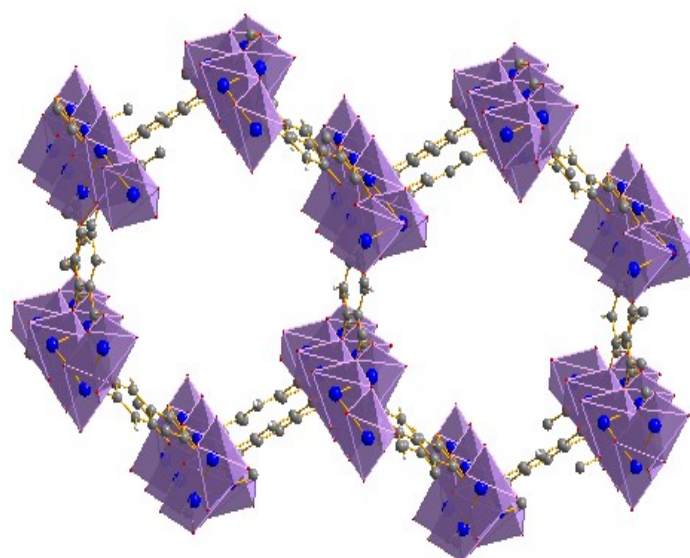

**Fig S1.** The structure diagram of Mn-MOF

---

\* Corresponding author: T. Wei ([wt863@126.com](mailto:wt863@126.com); [wt863@just.edu.cn](mailto:wt863@just.edu.cn)).

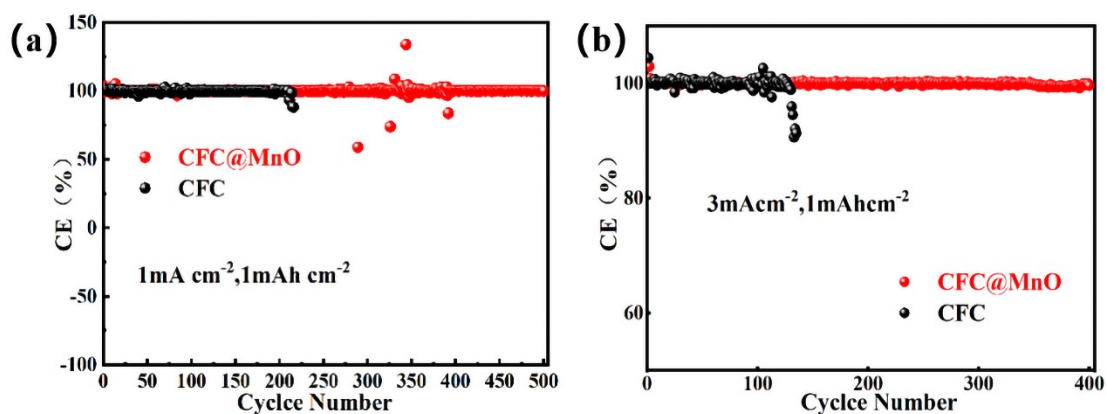

**Fig S2.** (a) Coulombic efficiency of CFC and CFC@MnO electrodes in half-cells at a current density of  $1 \text{ mA cm}^{-2}$  and a capacity density of  $1 \text{ mAh cm}^{-2}$ . (b) Coulombic efficiency of CFC and CFC@MnO electrodes in half-cells at a current density of  $3 \text{ mA cm}^{-2}$  and a capacity density of  $1 \text{ mAh cm}^{-2}$ .

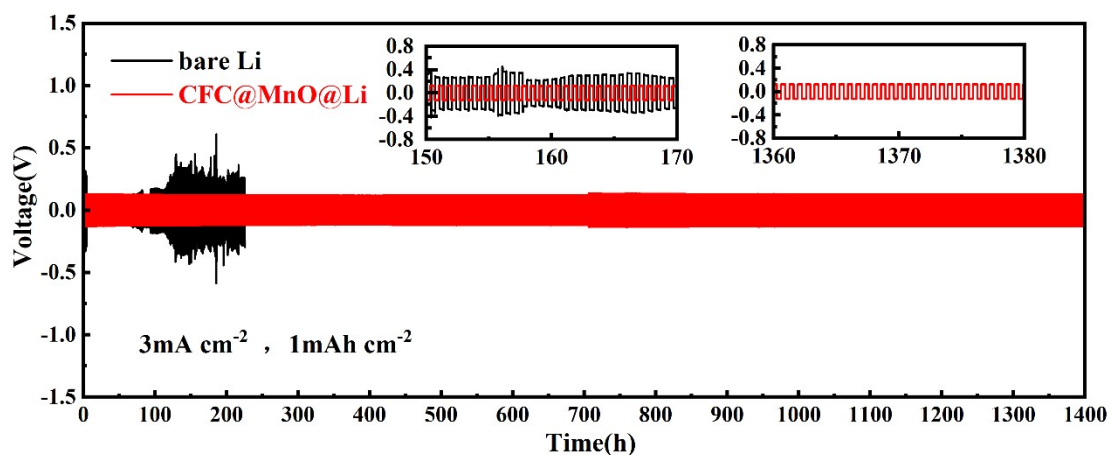

**Fig S3.** illustrates the cycling stability in two symmetric cells (bare Li and CFC@MnO@Li). (a) Cycling stability at a current density of  $3 \text{ mA cm}^{-2}$  and a cyclic capacity of  $1 \text{ mAh cm}^{-2}$ .

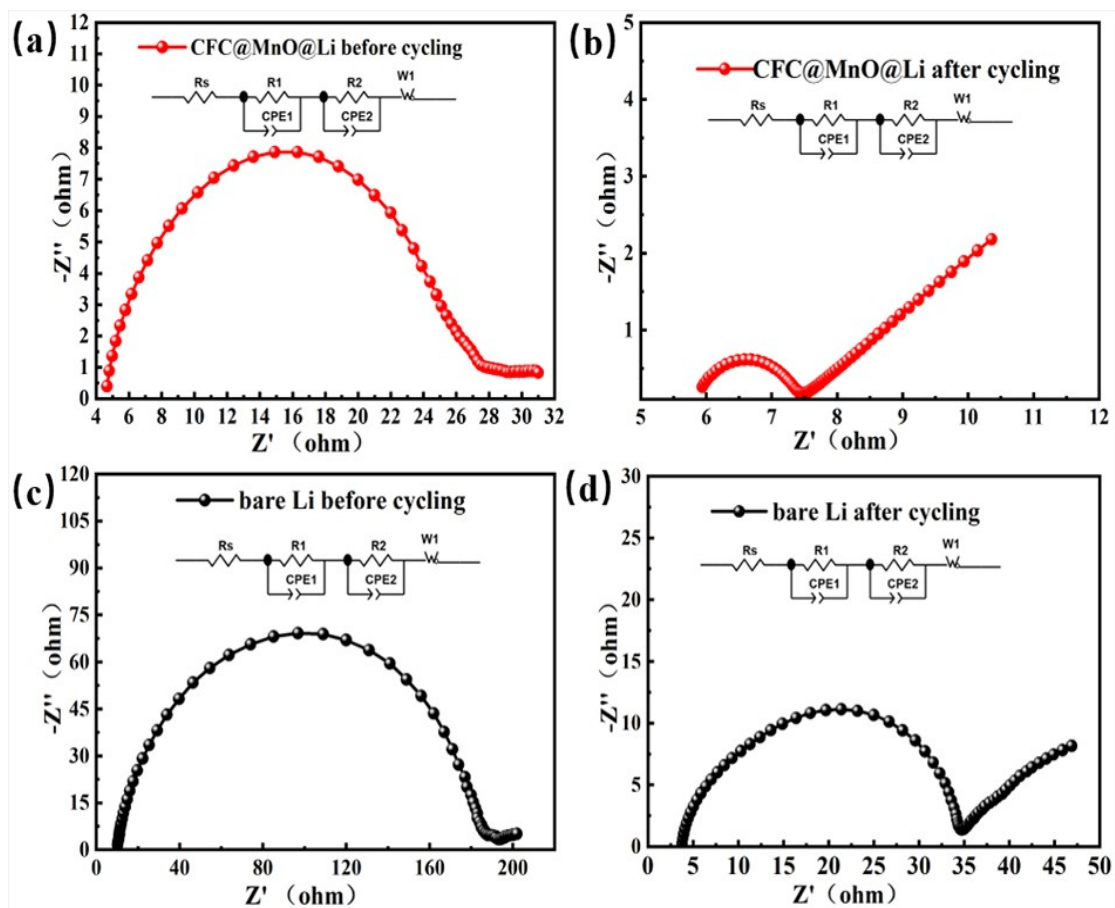

**Fig S4.** Nyquist plots of symmetric Li cells with different electrodes (inset shows the equivalent circuit). CFC@MnO@Li: (a) before cycling and (b) after cycling. Bare Li: (c) before cycling and (d) after cycling.

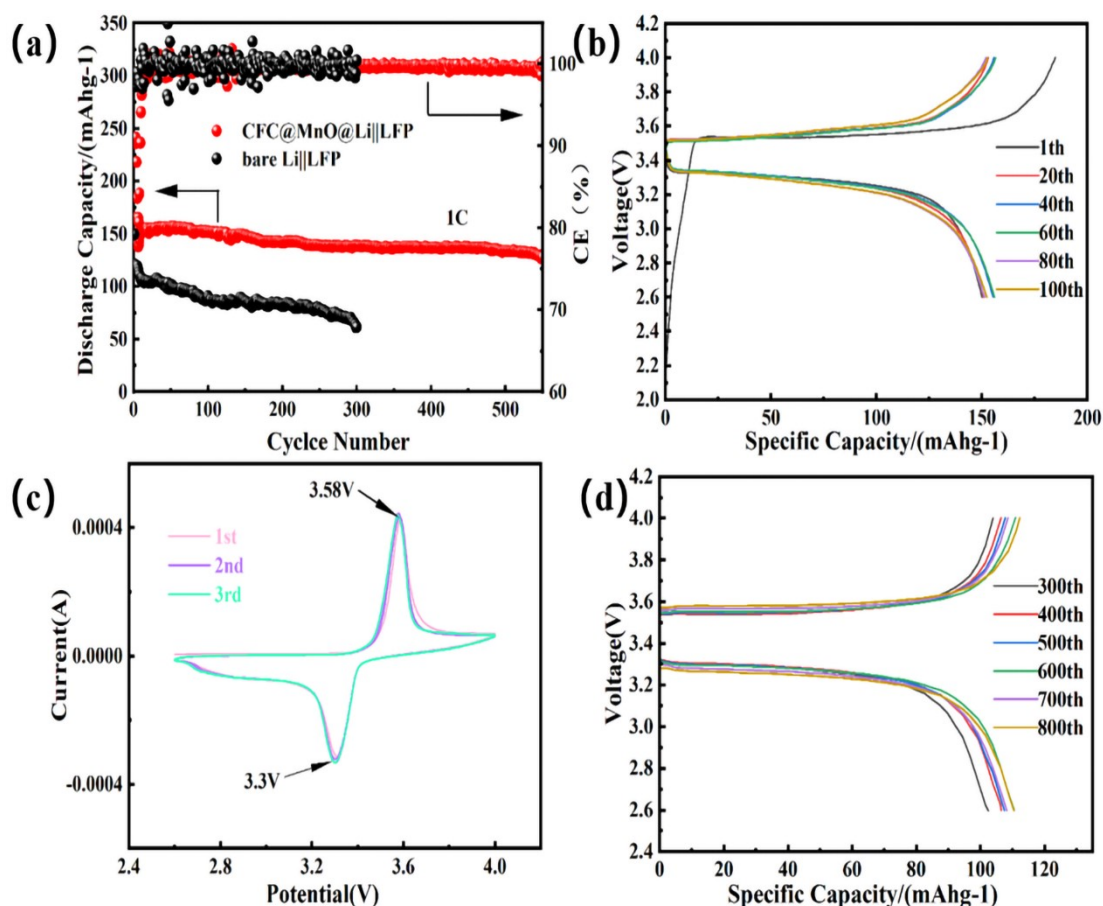

**Fig S5.** (a) Cycling performance of CFC@MnO@Li||LFP and bare Li||LFP cells at 1 C. (b) Cycling performance of CFC@MnO@Li||LFP cell at 1 C, represented by the corresponding charge-discharge profiles. (c) Cyclic voltammetry curves at a scan rate of 0.2 mV/s. (d) Cycling performance of CFC@MnO@Li||LFP cell at 5 C, represented by the corresponding charge-discharge profiles.

**Table S1.** Weight of bare Li, CFC, CFC@MnO and CFC@MnO@Li electrode.

| Materials                  | Average weight/ mg |
|----------------------------|--------------------|
| CFC                        | 22.0               |
| CFC@MnO                    | 25.0               |
| CFC@MnO@Li                 | 60.0               |
| Li in CFC@MnO@Li electrode | 35.0               |

**Table S2.** Comparison of the electrochemical performance of CFC@MnO@Li with the previous literature results.

| Materials                             | Current density (mA<br>cm <sup>-2</sup> ) | Cyclic<br>lifespan<br>(h) | Refer.           |
|---------------------------------------|-------------------------------------------|---------------------------|------------------|
| CFC@MnO@Li                            | 1                                         | 2300                      | <b>This work</b> |
|                                       | 3                                         | 1400                      |                  |
|                                       | 5                                         | 2400                      |                  |
| Li coated SNF<br>skeletons            | 3                                         | 600                       | [S1]             |
|                                       | 5                                         | 600                       |                  |
| Li@ZnO@CC                             | 1                                         | 560                       | [S2]             |
|                                       | 2                                         | 160                       |                  |
|                                       | 3                                         | 107                       |                  |
| CF@Sn@Li                              | 1                                         | 1000                      | [S3]             |
|                                       | 3                                         | 700                       |                  |
| Li-Co <sub>3</sub> O <sub>4</sub> -NF | 1                                         | 1000                      | [S4]             |
|                                       | 3                                         | 480                       |                  |
| 3DHF-Li                               | 1                                         | 900                       | [S5]             |
|                                       | 3                                         | 320                       |                  |
| MCuF@Li                               | 1                                         | 600                       | [S6]             |
|                                       | 3                                         | 300                       |                  |
| CC@CN-Co                              | 2                                         | 800                       | [S7]             |
|                                       | 2                                         | 500                       |                  |
|                                       | 5                                         | 1000                      |                  |

**Table S3.** Simulation results of equivalent circuit in Fig. S3.

|                     | $R_s/\Omega$ | $R_{int}/\Omega$ |
|---------------------|--------------|------------------|
| Bare Li (before)    | 5.4          | 160              |
| Bare Li (after)     | 3.6          | 34.5             |
| CFC@MnO@Li (before) | 3.6          | 25               |
| CFC@MnO@Li (after)  | 5.8          | 2.24             |

Notes: Semicircles at high and low-frequency regions in the Nyquist plots are associated with the SEI formation on the electrode surface, and the charge transfer process between the electrode/electrolyte interface, respectively.  $R_s$ : electrolyte resistance;  $R_f$ : surface film resistance;  $R_{ct}$ : charge transfer resistance; CPE: constant phase element;  $W_1$ : Warburg element (open).  $R_{int} = R_f + R_{ct}$ , representing interfacial resistance between the electrode and the electrolyte.

## References

- [S1] Y. Xia, Y. Jiang, Y.Y. Qi, W.Q. Zhang, Y. Wang, S.F. Wang, Y.M. Liu, W.W. Sun, X.-Z. Zhao, 3D stable hosts with controllable lithiophilic architectures for high-rate and high-capacity lithium metal anodes, *J. Power Sources* 442 (2019) 227214.
- [S2] D.Q. Jin, K. Hu, R. Hou, H. Shang, X.Y. Wang, Y. Ding, Y. Yan, H.J. Lin, K. Rui, J.X. Zhu, Vertical nanoarrays with lithiophilic sites suppress the growth of lithium dendrites for ultrastable lithium metal batteries, *Chem. Eng. J.* 405 (2021) 126808.
- [S3] T.C. Liu, X.D. Chen, C.C. Zhan, X.H. Cao, Y.W. Wang, J.H. Liu, Selective Lithium Deposition on 3D Porous Heterogeneous Lithiophilic Skeleton for Ultrastable Lithium Metal Anodes, *ChemNanoMat* 6 (8) (2020) 1200-1207.
- [S4] T. Wei, J.H. Lu, P. Zhang, G. Yang, C. Sun, Y.Y. Zhou, Q.C. Zhuang, Y.F. Tang, Metal-organic framework-derived  $\text{Co}_3\text{O}_4$  modified nickel foam-based dendrite-free anode for robust lithium metal batteries, *Chin. Chem. Lett.* 26 (2022) 107947.
- [S5] Y.Y. Qi, L. Lin, Z.L. Jian, K.Y. Qin, Y.X. Tan, Y.J. Zou, W. Chen, F.J. Li, Three-Dimensional Hierarchical Framework Loaded with Lithiophilic Nanorod Arrays for High-Performance Lithium-Metal Anodes, *ChemElectroChem* 7 (20) (2020) 4201-4207.
- [S6] Y. Zhou, K. Zhao, Y. Han, Z.H. Sun, H.T. Zhang, L.Q. Xu, Y.F. Ma, Y.S. Chen, A nitrogen-doped-carbon/ZnO modified Cu foam current collector for high-performance Li metal batteries, *J. Mater. Chem. A* 7 (10) (2019) 5712-5718.
- [S7] T. Zhou, J.D. Shen, Z.S. Wang, J. Liu, R.Z. Hu, L.Z. Ouyang, Y.Z. Feng, H. Liu, Y. Yu, M. Zhu, Regulating Lithium Nucleation and Deposition via MOF-Derived  $\text{Co}@C$ -Modified Carbon Cloth for Stable Li Metal Anode, *Adv. Funct. Mater.* 30 (14) (2020) 1909159.
